# Supplementary material for: Exciton-dominated Dielectric Function of Atomically Thin MoS2 Films
Source: PubMed Central journal article supplement (PMC4657050; doi:10.1038/srep16996), 2015-11-24
Supplement: srep16996-s1.pdf [file srep16996-s1.pdf]

*Supplementary Information*

**Exciton-dominated Dielectric Function of Atomically Thin MoS<sub>2</sub> Films**

Yiling Yu<sup>2</sup>, Yifei Yu<sup>1</sup>, Yongqing Cai<sup>3</sup>, Wei Li<sup>4</sup>, Alper Gurarlan<sup>1,5</sup>, Hartwin Peelaers<sup>6</sup>  
David E. Aspnes<sup>2</sup>, Chris G. Van de Walle<sup>6</sup>, Nhan V. Nguyen<sup>4</sup>, Yong-Wei Zhang<sup>3</sup>, Linyou Cao<sup>1,2\*</sup>

<sup>1</sup>Department of Materials Science and Engineering, North Carolina State University, Raleigh, NC 27695, USA; <sup>2</sup>Department of Physics, North Carolina State University, Raleigh NC 27695, USA;

<sup>3</sup>Institute of High Performance Computing, A\*STAR, Singapore 138632; <sup>4</sup>Semiconductor and Dimensional Metrology Division, National Institute of Standards and Technology, Gaithersburg, Maryland 20899, USA; <sup>5</sup>Department of Fiber and Polymer Science, North Carolina State University, Raleigh, NC 27695, USA; <sup>6</sup>Materials Department, University of California, Santa

Barbara, CA 93106, USA

\* To whom correspondence should be addressed.

Email: lcao2@ncsu.edu

This PDF file includes

Methods

Fig. S1-S12

Table. S1 Tabulated refractive index of MoS<sub>2</sub> films

References S1-S4

## Methods

*Synthesis of centimeter-scale MoS<sub>2</sub> films.* The centimeter monolayer and fewlayer MoS<sub>2</sub> films were grown using a chemical vapor deposition (CVD) process that we have previously developed<sup>1</sup>. In a typical growth, 4-20 mg molybdenum chloride (MoCl<sub>5</sub>) powder (99.99%, Sigma-Aldrich) and 1g sulfur powder (Sigma-Aldrich) was placed at the upstream of a tube furnace. Receiving substrates (typically sapphire) were placed in the downstream of the tube. Other typical experimental conditions for the growth include a temperature of 850 °C, a flow rate of 50 sccm, and a pressure around 2 Torr. The layer number was controlled by controlling the amount of precursors (MoCl<sub>5</sub>) used in the synthesis. We also grow centimeter-scale monolayer MoS<sub>2</sub> films using a similar chemical vapor deposition process but with MoO<sub>3</sub> and sulfur being used as precursors

The composition and structure of the synthesized MoS<sub>2</sub> films were extensively characterized by a variety of tools previously. In this work we mainly focused on characterizing the thickness and surface morphology of the synthesized films with optical microscopes and atomic force microscope (AFM, Veeco Dimension-3000).

*Ellipsometry measurements of MoS<sub>2</sub> films.* The ellipsometry measurement was performed with Woollam VASE (Variable Angle Spectroscopic Ellipsometer, J.A. Woollam Co.) with a Xenon light source in range of 200-1100nm. Typical incident angle was set at 65<sup>0</sup>, but we confirmed that the incident angle does not affect the resulting dielectric constants. The ellipsometry measurement essentially monitors changes in the polarization state of incident light and the light reflected from the films. It yields two spectral parameters ( $\psi$  and  $\Delta$ ) related with the amplitude ( $\tan \psi$ ) and phase  $\Delta$  of a reflectance ratio  $\rho$ , which indicates the ratio of the reflection coefficients for  $p$ -polarized (parallel to the plane of incidence) and  $s$ -polarized (perpendicular to the plane of incidence) light,  $\rho = r_p/r_s = (\tan\psi)e^{i\Delta}$ . To retrieve the optical constant from the measured results, we perform regression fitting using the Fresnel's equations of a simple two-layer model that consists of a MoS<sub>2</sub> film on top of a semi-infinite substrate. Precise information of the thickness of the film is required for the fitting, which we have obtained by AFM measurements in experiments. We have also confirmed that the surfaces of all the films studied are atomically smooth (roughness < 1 nm) by the AFM measurements (Fig. S1-S3). The typical fitting for experimental results is given in Fig. S4.

*First-principles calculations.* Our DFT calculations are carried out using the plane wave code Vienna ab initio simulation package (VASP)<sup>2</sup> with the generalized gradient approximation (GGA). Spin-orbital coupling calculations using the projector augmented wave method with the Perdew–Burke–Ernzerhof functional (PAW-PBE) and a cutoff energy of 400 eV are performed. The multilayer MoS<sub>2</sub> structures are adopted by the experimental lattice of bulk 2H-MoS<sub>2</sub>, and the structures are fully relaxed until the Hellmann-Feynman forces become less than 0.01 eV/Å, by using the van der Waals optB88 functional<sup>3</sup> to obtain an accurate description of the dispersion force and the interlayer distance. The first Brillouin zone is sampled with a 15 × 15 × 1 Monkhorst-Pack grid and a vacuum region with thickness greater than 15 Å is adopted.

The optical properties are calculated based on independent-particle approximation. The involved unoccupied band number is about 10 times of that of valence bands to achieve the converged dielectric function. The accuracy of the k-point sampling is tested for using 15 × 15 and 18 × 18 grid for 1L-3L MoS<sub>2</sub>, and the calculated dielectric spectra is shown in Fig. S7. While there are

some discrepancies in the low-energy part between these two k-points sets, good convergence is observed for the “C” peak at around 2.75 eV, consistent with previous work<sup>4</sup>. Similarly, for the SOC effect (Fig. S8), the imaginary part of the dielectric constant for MoS<sub>2</sub> layers from 1L to 5L shows little effect from the SOC.

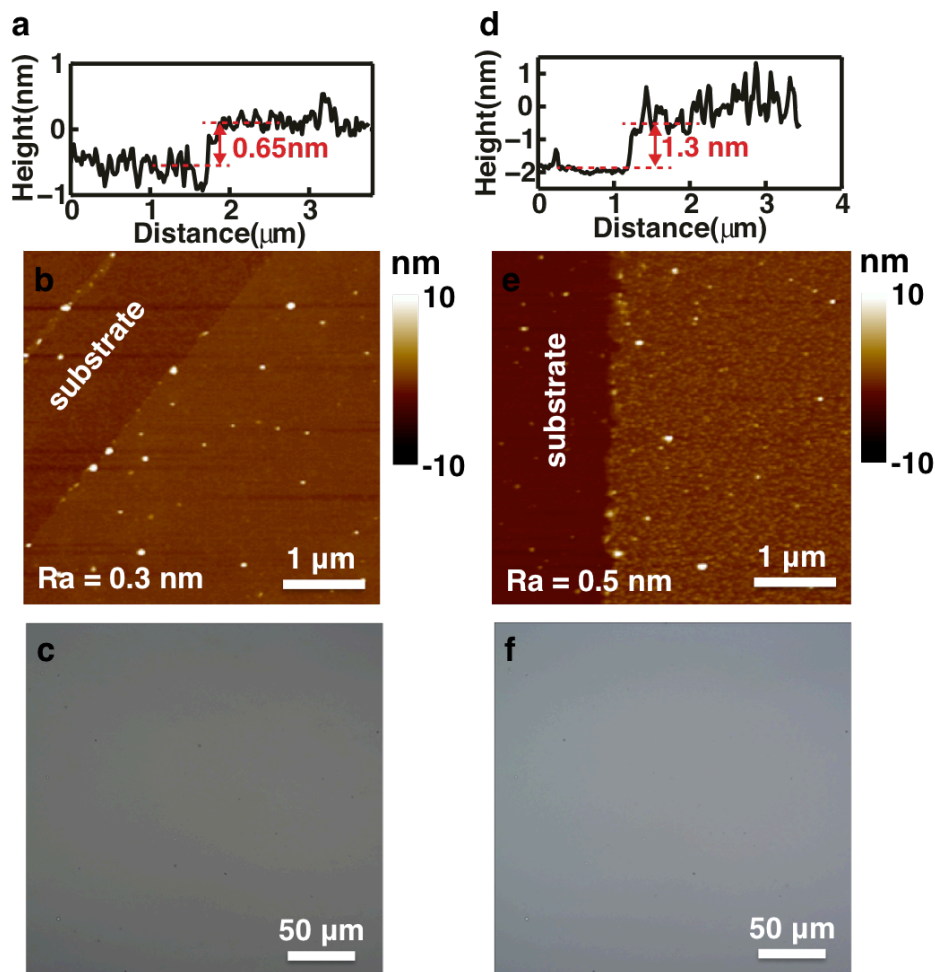

**Figure S1. Characterization of monolayer and bilayer MoS<sub>2</sub> films.** (a-c) Typical height profile extracted from AFM measurements, AFM image, and optical image of monolayer MoS<sub>2</sub> films. The surface roughness is measured as 0.3 nm as shown in the AFM image. (d-f) Typical height profile extracted from AFM measurements, AFM image, and optical image of bilayer MoS<sub>2</sub> films. The surface roughness is measured as 0.5 nm as shown in the AFM image.

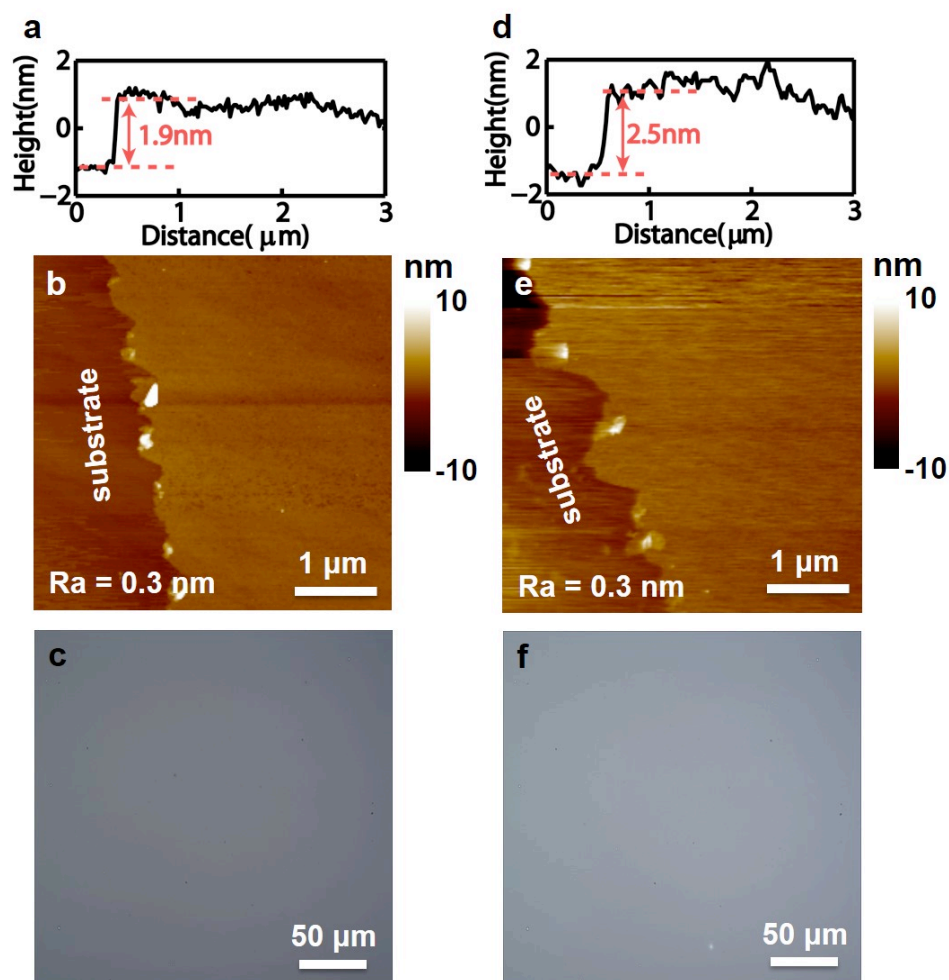

**Figure S2. Characterization of three-layer (3L) and four-layer (4L) MoS<sub>2</sub> films.** (a-c) Typical height profile extracted from AFM measurements, AFM image, and optical image of 3L MoS<sub>2</sub> films. The surface roughness is measured as 0.3 nm as shown in the AFM image. (d-f) Typical height profile extracted from AFM measurements, AFM image, and optical image of 4L MoS<sub>2</sub> films. The surface roughness is measured as 0.3 nm as shown in the AFM image.

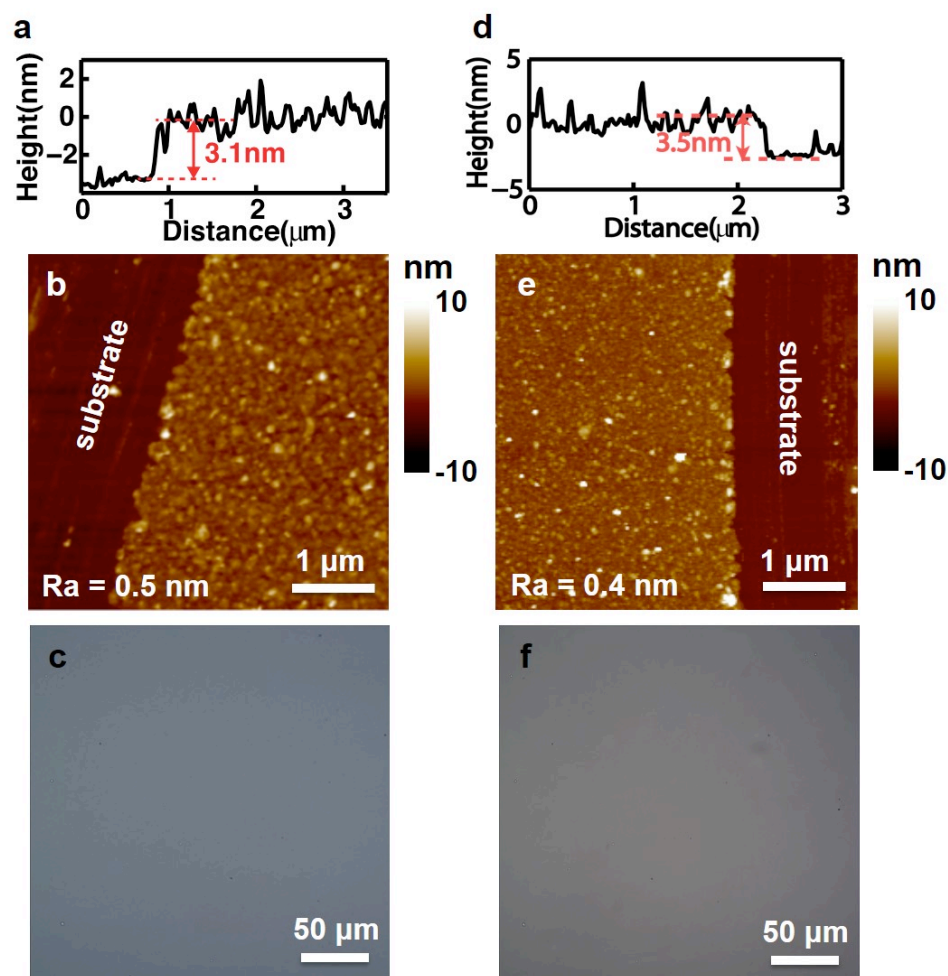

**Figure S3. Characterization of five-layer (5L) and six-layer (6L) MoS<sub>2</sub> films.** (a-c) Typical height profile extracted from AFM measurements, AFM image, and optical image of 5L MoS<sub>2</sub> films. The surface roughness is measured as 0.5 nm as shown in the AFM image. (d-f) Typical height profile extracted from AFM measurements, AFM image, and optical image of 6L MoS<sub>2</sub> films. The surface roughness is measured as 0.4 nm as shown in the AFM image.

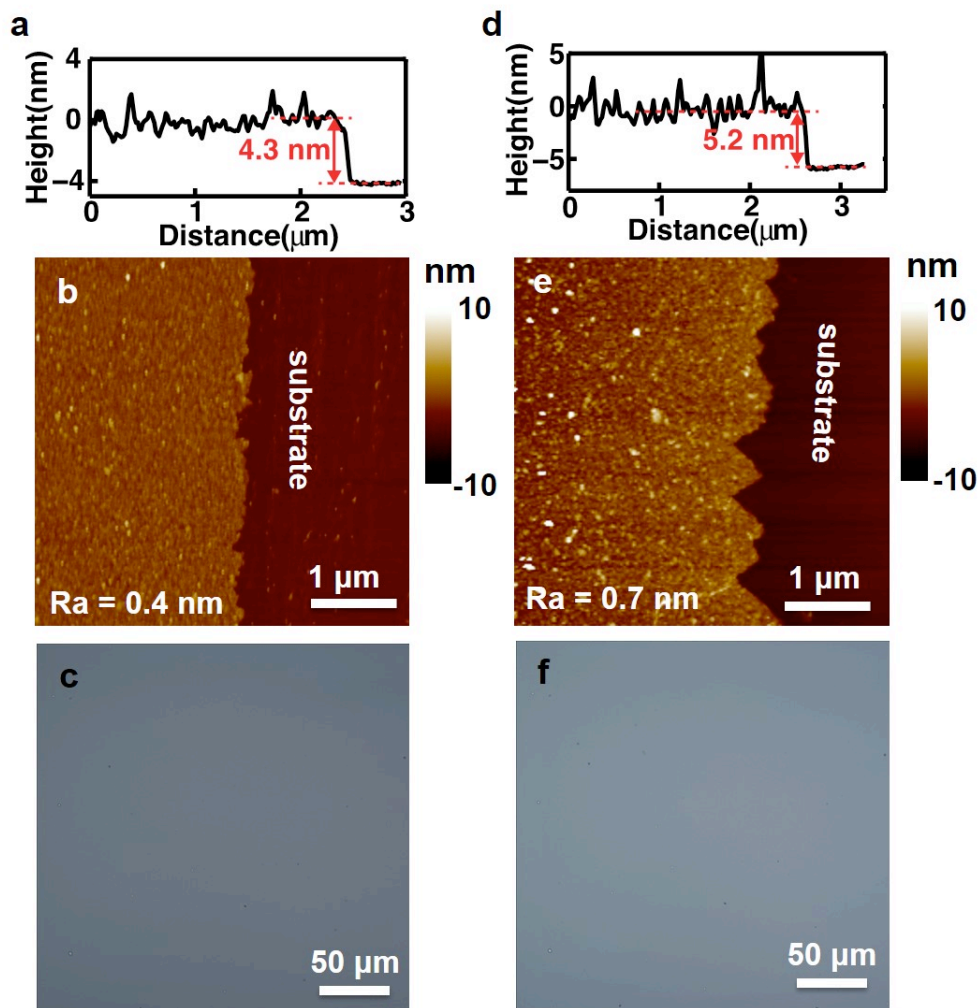

**Figure S4. Characterization of seven-layer (7L) and eight-layer (8L) MoS<sub>2</sub> films.** (a-c) Typical height profile extracted from AFM measurements, AFM image, and optical image of 7L MoS<sub>2</sub> films. The surface roughness is measured as 0.4 nm as shown in the AFM image. (d-f) Typical height profile extracted from AFM measurements, AFM image, and optical image of 8L MoS<sub>2</sub> films. The surface roughness is measured as 0.9 nm as shown in the AFM image

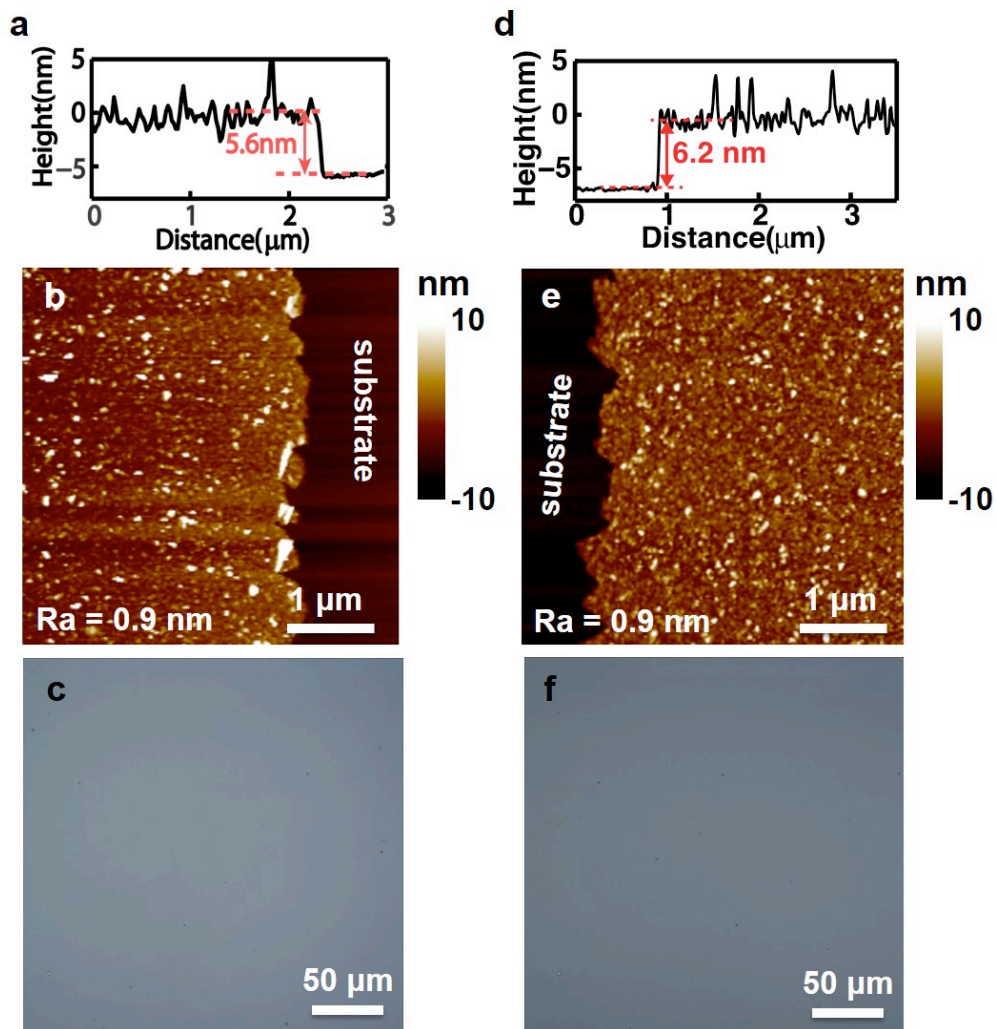

**Figure S5. Characterization of nine-layer (9L) and ten-layer (10L) MoS<sub>2</sub> films.** (a-c) Typical height profile extracted from AFM measurements, AFM image, and optical image of 9L MoS<sub>2</sub> films. The surface roughness is measured as 0.9 nm as shown in the AFM image. (d-f) Typical height profile extracted from AFM measurements, AFM image, and optical image of 10L MoS<sub>2</sub> films. The surface roughness is measured as 0.9 nm as shown in the AFM image

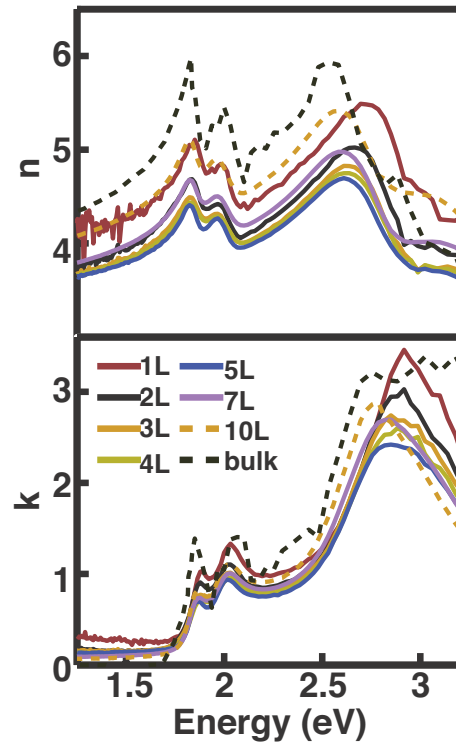

**Figure S6. Refractive index of 2D MoS<sub>2</sub>.** Real (upper panel) and imaginary (lower panel) parts of the dielectric function of 2D MoS<sub>2</sub> vs. layer number. Also given is the refractive index of bulk MoS<sub>2</sub>.



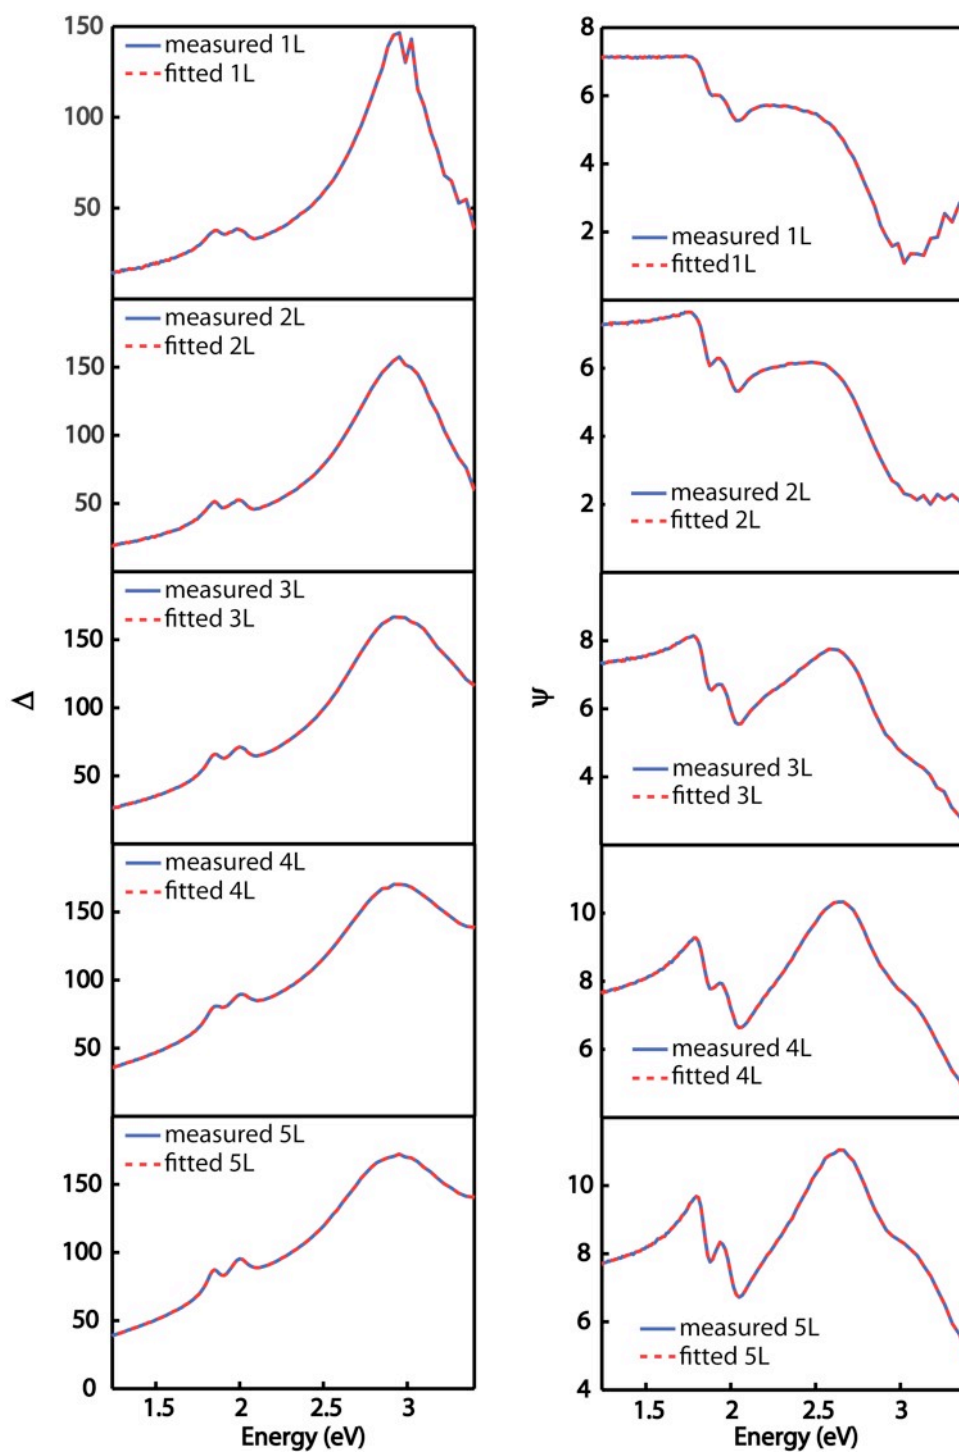

**Figure S7. Fitting for the results obtained from ellipsometry measurements.** (a) Fitted and measured phase  $\Delta$  from monolayer to 5-layer MoS2 films. (b) Fitted and measured amplitude  $\psi$  for monolayer to 5-layer MoS2 films.

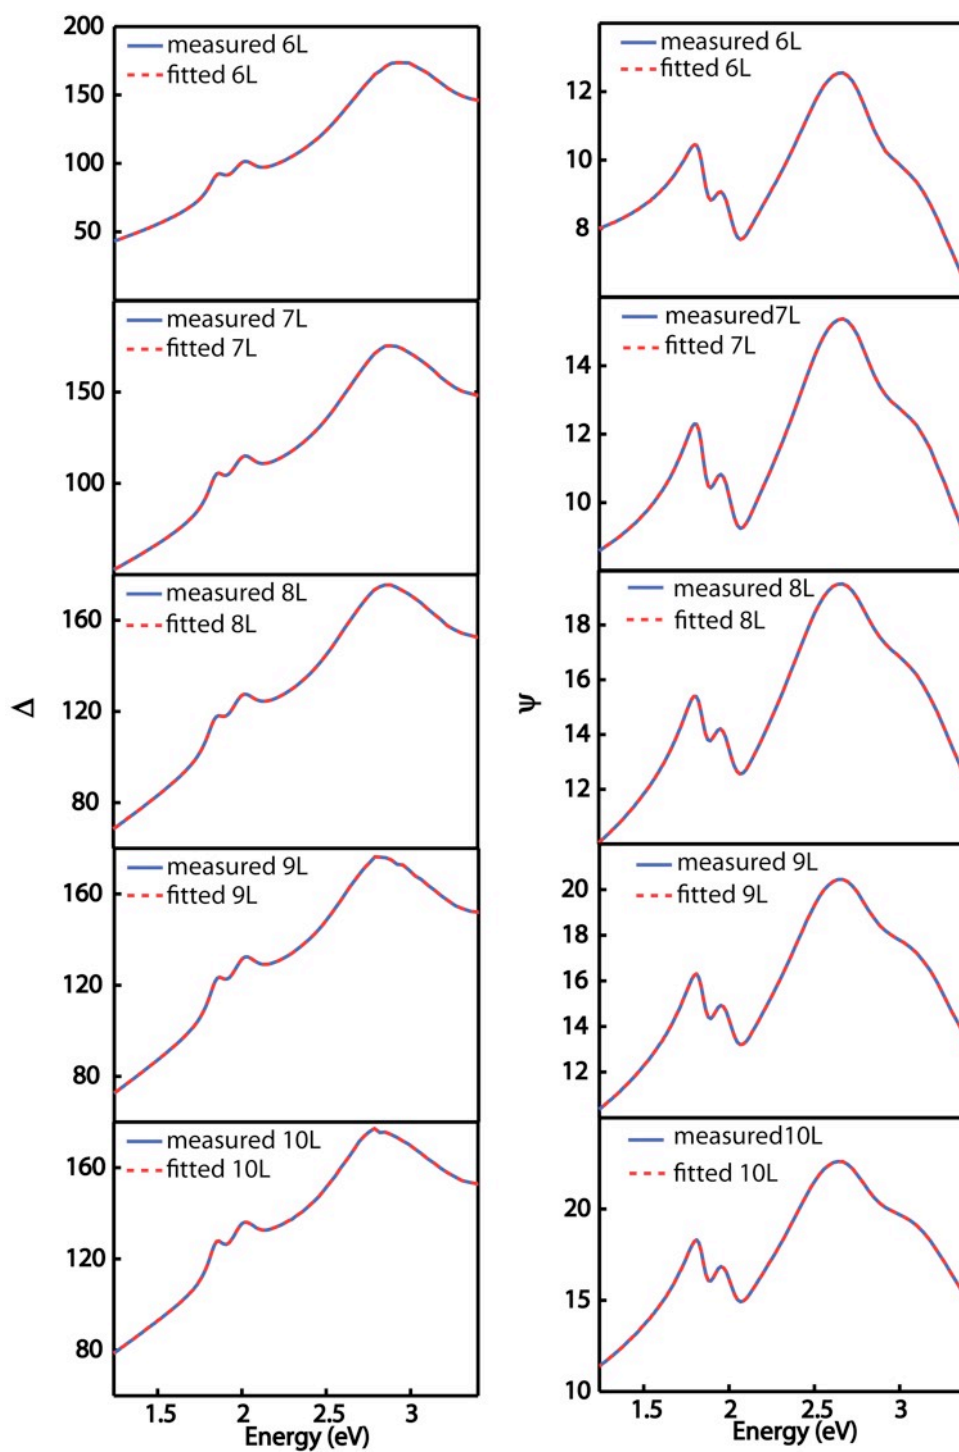

**Figure S8. Fitting for the results obtained from ellipsometry measurements.** (a) Fitted and measured phase  $\Delta$  from 6-layer to 10-layer MoS<sub>2</sub> films. (b) Fitted and measured amplitude  $\psi$  for 6-layer to 10-layer MoS<sub>2</sub> films.

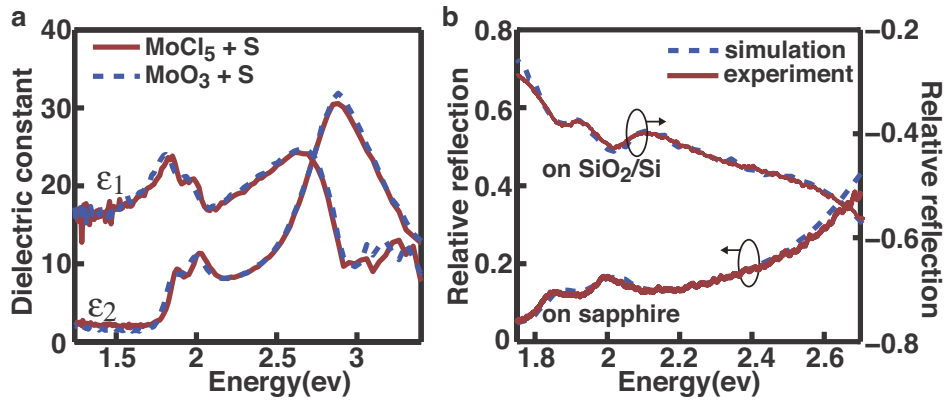

**Figure S9. Independence of the measured dielectric function from synthetic processes and substrates.** (a) Measured dielectric constants of as-grown monolayer MoS<sub>2</sub> made by two different CVD processes, one using MoCl<sub>5</sub> and S as the precursors and the other using MoO<sub>3</sub> and S as the precursors. The growth substrate in both growths is sapphire. (b) Measured and simulated reflection spectra of monolayer MoS<sub>2</sub> on different substrates, sapphire and silicon with 80 nm thick thermal oxide. The monolayer MoS<sub>2</sub> involved is grown on sapphire substrates and then transferred to SiO<sub>2</sub>/Si substrates. The simulation uses the optical constant measured with the as-grown MoS<sub>2</sub> on sapphire substrates.

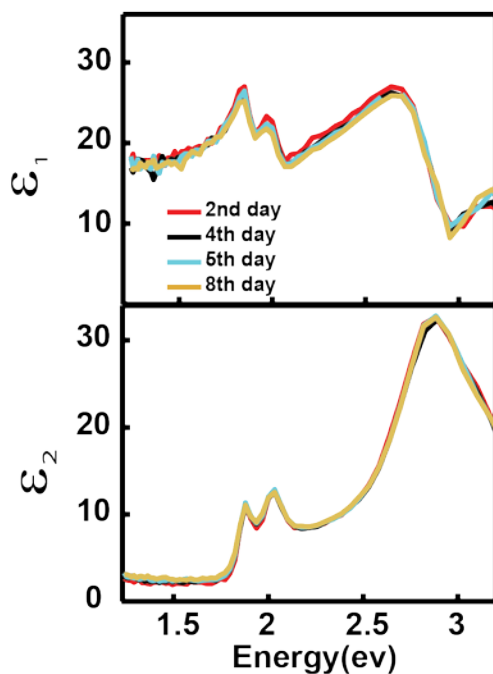

**Figure S10. Stability of the dielectric function.** Real (upper panel) and imaginary (lower panel) parts of the dielectric function of monolayer MoS<sub>2</sub> measured at different times after synthesis.

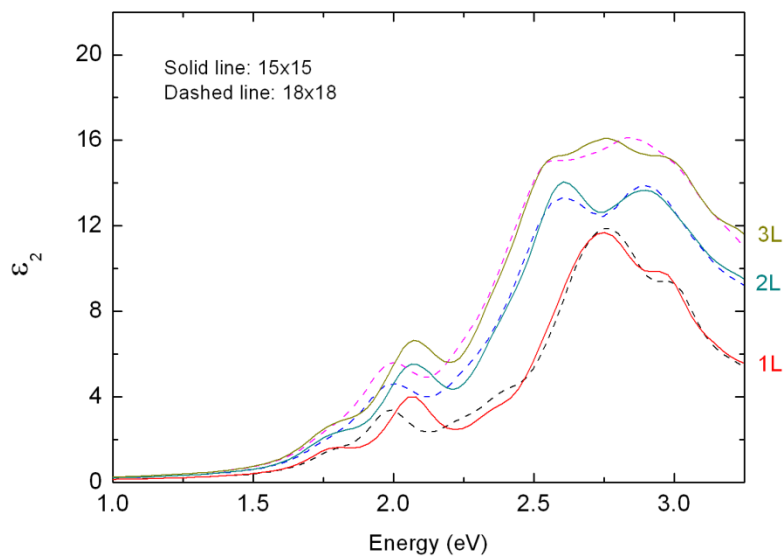

**Figure S11.** Imaginary part of the dielectric constant for MoS<sub>2</sub> layers from 1L to 3L calculated different k-point sampling.

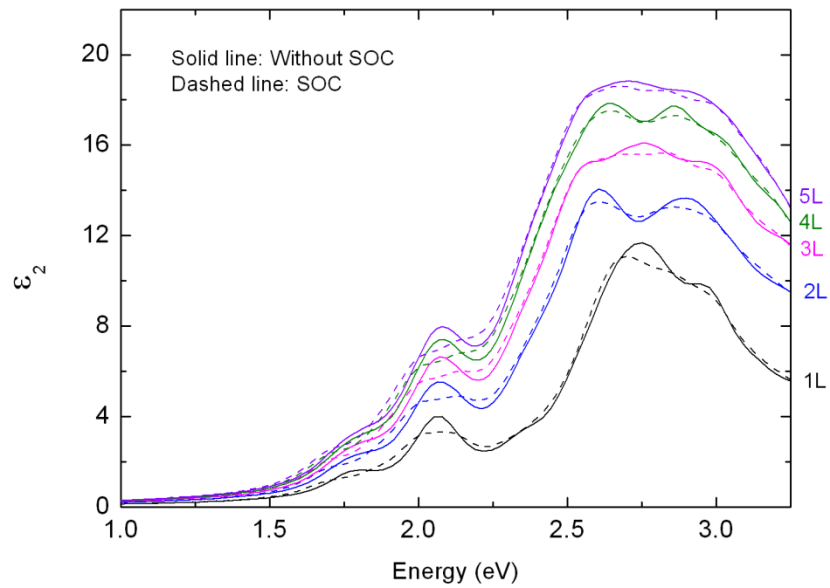

**Figure S12.** Imaginary part of the dielectric constant for MoS<sub>2</sub> layers from 1L to 5L calculated with spin-orbital coupling (dashed lines) and without spin-orbital coupling (solid lines).

**Table S1. Tabulated refractive index of MoS<sub>2</sub> films**

| wavelength(nm) | 1L     |        | 2L     |         | 3L     |         |
|----------------|--------|--------|--------|---------|--------|---------|
|                | n      | k      | n      | k       | n      | k       |
| 345            | 3.035  | 2.1095 | 3.1215 | 1.48    | 3.1584 | 1.4242  |
| 350            | 3.3642 | 1.711  | 3.1431 | 1.6304  | 3.1799 | 1.3707  |
| 355            | 3.2948 | 1.7682 | 3.3188 | 1.5147  | 3.1516 | 1.4211  |
| 360            | 3.0747 | 2.2111 | 3.4153 | 1.4939  | 3.3381 | 1.3626  |
| 365            | 3.4136 | 1.9955 | 3.482  | 1.4957  | 3.3745 | 1.4535  |
| 370            | 4.0257 | 1.8186 | 3.5141 | 1.636   | 3.4953 | 1.5307  |
| 375            | 3.9504 | 1.964  | 3.6118 | 1.6953  | 3.5514 | 1.6638  |
| 380            | 4.2656 | 2.1141 | 3.7339 | 1.8568  | 3.6016 | 1.8068  |
| 385            | 4.2966 | 2.2502 | 3.8891 | 1.9414  | 3.6983 | 1.8775  |
| 390            | 4.241  | 2.5232 | 3.8747 | 2.128   | 3.7274 | 1.9909  |
| 395            | 4.2479 | 2.7103 | 3.8809 | 2.3194  | 3.7528 | 2.1365  |
| 400            | 4.2558 | 2.9601 | 3.9263 | 2.4171  | 3.7368 | 2.2653  |
| 405            | 4.4645 | 2.9673 | 3.987  | 2.4962  | 3.721  | 2.4118  |
| 410            | 4.538  | 3.1094 | 3.9502 | 2.6409  | 3.7648 | 2.4578  |
| 415            | 4.5785 | 3.2506 | 3.9717 | 2.7826  | 3.7127 | 2.6254  |
| 420            | 4.6688 | 3.3453 | 4.0257 | 2.8704  | 3.816  | 2.6231  |
| 425            | 4.6942 | 3.461  | 3.9825 | 3.0278  | 3.889  | 2.6862  |
| 430            | 4.9523 | 3.334  | 4.2523 | 2.9482  | 4.0043 | 2.6842  |
| 435            | 5.1659 | 3.1845 | 4.3822 | 2.9453  | 4.0705 | 2.7412  |
| 440            | 5.3321 | 2.9496 | 4.5641 | 2.8467  | 4.2579 | 2.6839  |
| 445            | 5.4295 | 2.7198 | 4.724  | 2.6996  | 4.4327 | 2.5853  |
| 450            | 5.471  | 2.5039 | 4.8808 | 2.5191  | 4.5802 | 2.4602  |
| 455            | 5.4828 | 2.3085 | 4.9702 | 2.3155  | 4.6858 | 2.2951  |
| 460            | 5.4897 | 2.1087 | 5.0077 | 2.128   | 4.7639 | 2.1338  |
| 465            | 5.4255 | 1.9334 | 5.0223 | 1.9605  | 4.8122 | 1.9741  |
| 470            | 5.3851 | 1.7774 | 5.0186 | 1.7949  | 4.8247 | 1.802   |
| 475            | 5.3511 | 1.6549 | 4.9916 | 1.648   | 4.8261 | 1.6554  |
| 480            | 5.2685 | 1.5181 | 4.9396 | 1.509   | 4.7934 | 1.5116  |
| 485            | 5.1999 | 1.4334 | 4.9015 | 1.3921  | 4.7569 | 1.3899  |
| 490            | 5.1296 | 1.3522 | 4.8236 | 1.2948  | 4.7065 | 1.2803  |
| 495            | 5.0832 | 1.2878 | 4.7654 | 1.2128  | 4.6505 | 1.1969  |
| 500            | 5.0093 | 1.2361 | 4.7054 | 1.1513  | 4.5976 | 1.1257  |
| 505            | 4.9526 | 1.1885 | 4.6687 | 1.0974  | 4.5475 | 1.0737  |
| 510            | 4.918  | 1.1623 | 4.6115 | 1.0532  | 4.4963 | 1.0202  |
| 515            | 4.8614 | 1.1215 | 4.5572 | 1.0157  | 4.4548 | 0.97899 |
| 520            | 4.8404 | 1.0768 | 4.511  | 0.98054 | 4.4037 | 0.93817 |
| 525            | 4.7757 | 1.0698 | 4.4642 | 0.94246 | 4.354  | 0.91249 |
| 530            | 4.7458 | 1.0402 | 4.4245 | 0.92324 | 4.3213 | 0.89069 |
| 535            | 4.6875 | 1.0243 | 4.3847 | 0.91436 | 4.2826 | 0.87048 |

|     |        |         |        |         |        |         |
|-----|--------|---------|--------|---------|--------|---------|
| 540 | 4.6276 | 1.0169  | 4.3481 | 0.8949  | 4.2396 | 0.85457 |
| 545 | 4.6184 | 1.0045  | 4.3139 | 0.87514 | 4.2103 | 0.84473 |
| 550 | 4.5974 | 0.98786 | 4.2807 | 0.86571 | 4.1887 | 0.83567 |
| 555 | 4.5692 | 0.97655 | 4.2529 | 0.8587  | 4.151  | 0.82515 |
| 560 | 4.5375 | 0.98979 | 4.2331 | 0.84906 | 4.1273 | 0.81697 |
| 565 | 4.4953 | 0.97569 | 4.1915 | 0.84723 | 4.1036 | 0.81305 |
| 570 | 4.4593 | 0.98802 | 4.1599 | 0.85819 | 4.0785 | 0.8257  |
| 575 | 4.4652 | 0.99232 | 4.1311 | 0.86358 | 4.0557 | 0.83162 |
| 580 | 4.4046 | 1.0283  | 4.1233 | 0.86556 | 4.0351 | 0.84601 |
| 585 | 4.3665 | 1.0652  | 4.0993 | 0.90042 | 4.0186 | 0.85957 |
| 590 | 4.4281 | 1.1133  | 4.0773 | 0.92505 | 4.0076 | 0.88298 |
| 595 | 4.3854 | 1.1736  | 4.0568 | 0.98182 | 4.007  | 0.91261 |
| 600 | 4.4185 | 1.2453  | 4.0802 | 1.0272  | 4.0194 | 0.95695 |
| 605 | 4.4832 | 1.293   | 4.1333 | 1.0777  | 4.0487 | 0.98958 |
| 610 | 4.5949 | 1.3319  | 4.1995 | 1.1032  | 4.1102 | 1.0138  |
| 615 | 4.7645 | 1.2887  | 4.2755 | 1.1024  | 4.1728 | 1.0085  |
| 620 | 4.823  | 1.2336  | 4.3632 | 1.0654  | 4.238  | 0.97982 |
| 625 | 4.8473 | 1.1104  | 4.405  | 0.99226 | 4.2943 | 0.9388  |
| 630 | 4.8233 | 1.0397  | 4.4202 | 0.93166 | 4.3156 | 0.8626  |
| 635 | 4.7608 | 0.9785  | 4.4086 | 0.87284 | 4.3128 | 0.80623 |
| 640 | 4.7993 | 0.9588  | 4.3911 | 0.84114 | 4.295  | 0.76433 |
| 645 | 4.757  | 0.94393 | 4.3689 | 0.82963 | 4.2724 | 0.7384  |
| 650 | 4.7445 | 0.97564 | 4.3675 | 0.84836 | 4.2619 | 0.74509 |
| 655 | 4.8177 | 1.033   | 4.3777 | 0.87778 | 4.2712 | 0.76408 |
| 660 | 4.9334 | 1.0246  | 4.448  | 0.90742 | 4.3095 | 0.77144 |
| 665 | 5.0486 | 0.94987 | 4.5632 | 0.87405 | 4.373  | 0.75421 |
| 670 | 5.1062 | 0.80879 | 4.6477 | 0.78976 | 4.4384 | 0.70404 |
| 675 | 5.0349 | 0.67168 | 4.6851 | 0.66598 | 4.4861 | 0.62352 |
| 680 | 5.0504 | 0.53835 | 4.6786 | 0.54976 | 4.4922 | 0.52238 |
| 685 | 4.9719 | 0.45368 | 4.6382 | 0.47019 | 4.4656 | 0.42973 |
| 690 | 4.9161 | 0.39993 | 4.5794 | 0.39449 | 4.4248 | 0.365   |
| 695 | 4.8819 | 0.34722 | 4.5294 | 0.34297 | 4.3719 | 0.31735 |
| 700 | 4.7792 | 0.31574 | 4.4932 | 0.30126 | 4.3385 | 0.28054 |
| 705 | 4.7406 | 0.3121  | 4.4461 | 0.27104 | 4.2891 | 0.2527  |
| 710 | 4.7011 | 0.3007  | 4.4192 | 0.24924 | 4.2509 | 0.23223 |
| 715 | 4.6449 | 0.28574 | 4.3796 | 0.21906 | 4.2112 | 0.21784 |
| 720 | 4.6281 | 0.2684  | 4.3454 | 0.20235 | 4.1777 | 0.20581 |
| 725 | 4.6008 | 0.25389 | 4.3018 | 0.18963 | 4.149  | 0.19284 |
| 730 | 4.5917 | 0.26534 | 4.2665 | 0.18329 | 4.1269 | 0.18748 |
| 735 | 4.564  | 0.25114 | 4.2493 | 0.17875 | 4.1062 | 0.18071 |
| 740 | 4.4731 | 0.25553 | 4.2084 | 0.17008 | 4.0695 | 0.1786  |
| 745 | 4.4781 | 0.23703 | 4.1905 | 0.16271 | 4.0515 | 0.17313 |
| 750 | 4.4968 | 0.26643 | 4.1663 | 0.1677  | 4.0331 | 0.16169 |
| 755 | 4.4555 | 0.24217 | 4.1474 | 0.16509 | 4.0284 | 0.16304 |

|     |        |         |        |         |        |         |
|-----|--------|---------|--------|---------|--------|---------|
| 760 | 4.4546 | 0.25444 | 4.1122 | 0.15967 | 4.0049 | 0.1699  |
| 765 | 4.4104 | 0.25882 | 4.108  | 0.15712 | 3.9894 | 0.1553  |
| 770 | 4.3872 | 0.25604 | 4.0846 | 0.15634 | 3.9607 | 0.1585  |
| 775 | 4.3246 | 0.2661  | 4.0686 | 0.16126 | 3.9767 | 0.16305 |
| 780 | 4.3012 | 0.22656 | 4.0303 | 0.15816 | 3.9409 | 0.1541  |
| 785 | 4.3975 | 0.27913 | 4.0053 | 0.16128 | 3.9261 | 0.15155 |
| 790 | 4.3033 | 0.23178 | 4.0308 | 0.15668 | 3.8957 | 0.1591  |
| 795 | 4.3539 | 0.25401 | 3.9956 | 0.15633 | 3.882  | 0.16254 |
| 800 | 4.3375 | 0.2661  | 3.9946 | 0.1528  | 3.8753 | 0.14879 |
| 805 | 4.2829 | 0.27118 | 3.9805 | 0.15312 | 3.8912 | 0.15733 |
| 810 | 4.2618 | 0.21999 | 3.963  | 0.14757 | 3.871  | 0.14949 |
| 815 | 4.4143 | 0.24665 | 3.9551 | 0.15666 | 3.8526 | 0.15579 |
| 820 | 4.262  | 0.25912 | 3.9322 | 0.16006 | 3.8459 | 0.16055 |
| 825 | 4.2599 | 0.25859 | 3.9248 | 0.15353 | 3.837  | 0.15222 |
| 830 | 4.2536 | 0.28422 | 3.9241 | 0.14709 | 3.843  | 0.15066 |
| 835 | 4.3063 | 0.27486 | 3.9432 | 0.1558  | 3.8332 | 0.14969 |
| 840 | 4.2071 | 0.26591 | 3.9436 | 0.15872 | 3.8175 | 0.15397 |
| 845 | 4.0152 | 0.30428 | 3.9045 | 0.15062 | 3.8431 | 0.14614 |
| 850 | 4.384  | 0.28634 | 3.9846 | 0.16584 | 3.8452 | 0.17482 |
| 855 | 4.2731 | 0.27395 | 3.9277 | 0.16079 | 3.7805 | 0.1484  |
| 860 | 4.2313 | 0.29451 | 3.9019 | 0.16303 | 3.8043 | 0.16181 |
| 865 | 4.0518 | 0.25802 | 3.8836 | 0.16324 | 3.8042 | 0.16507 |
| 870 | 4.2107 | 0.29103 | 3.8418 | 0.159   | 3.7678 | 0.15209 |
| 875 | 4.1901 | 0.28231 | 3.8546 | 0.15625 | 3.7828 | 0.14107 |
| 880 | 4.2146 | 0.2688  | 3.8225 | 0.15519 | 3.7643 | 0.16109 |
| 885 | 4.1368 | 0.26439 | 3.8191 | 0.15187 | 3.7538 | 0.14589 |
| 890 | 4.2505 | 0.27241 | 3.8828 | 0.15811 | 3.7618 | 0.14685 |
| 895 | 4.1246 | 0.275   | 3.823  | 0.15444 | 3.7427 | 0.15058 |
| 900 | 4.2324 | 0.27653 | 3.8394 | 0.16086 | 3.7517 | 0.15551 |
| 905 | 4.1399 | 0.29945 | 3.8437 | 0.15368 | 3.7459 | 0.1452  |
| 910 | 4.0882 | 0.27867 | 3.8041 | 0.14879 | 3.7418 | 0.16137 |
| 915 | 4.204  | 0.27915 | 3.8372 | 0.16322 | 3.7354 | 0.15593 |
| 920 | 4.2151 | 0.29217 | 3.7608 | 0.1558  | 3.7179 | 0.14731 |
| 925 | 4.1818 | 0.31775 | 3.8349 | 0.16625 | 3.7208 | 0.15206 |
| 930 | 3.9989 | 0.27231 | 3.8169 | 0.17591 | 3.727  | 0.14932 |
| 935 | 4.2799 | 0.28077 | 3.8124 | 0.16884 | 3.6963 | 0.15023 |
| 940 | 4.2274 | 0.30284 | 3.7828 | 0.16941 | 3.6996 | 0.16622 |
| 945 | 4.3511 | 0.29421 | 3.7913 | 0.16523 | 3.7445 | 0.15839 |
| 950 | 4.2508 | 0.29206 | 3.7844 | 0.17303 | 3.6923 | 0.15044 |
| 955 | 4.3307 | 0.29048 | 3.8152 | 0.16167 | 3.7089 | 0.15293 |
| 960 | 4.1119 | 0.36195 | 3.7906 | 0.17346 | 3.6594 | 0.15831 |
| 965 | 3.6847 | 0.30302 | 3.7358 | 0.16777 | 3.6834 | 0.16439 |
| 970 | 4.2891 | 0.30635 | 3.7615 | 0.17787 | 3.6761 | 0.15848 |
| 975 | 4.2642 | 0.32016 | 3.7736 | 0.18801 | 3.7132 | 0.16278 |



|      |        |         |        |         |        |         |
|------|--------|---------|--------|---------|--------|---------|
| 980  | 4.0643 | 0.30154 | 3.7598 | 0.16946 | 3.6674 | 0.15559 |
| 985  | 4.0738 | 0.30023 | 3.7561 | 0.18424 | 3.6723 | 0.15389 |
| 990  | 4.26   | 0.31443 | 3.8044 | 0.17347 | 3.68   | 0.15773 |
| 995  | 4.1482 | 0.32433 | 3.7509 | 0.18282 | 3.6638 | 0.15621 |
| 1000 | 4.1655 | 0.32855 | 3.7309 | 0.1854  | 3.6428 | 0.15677 |

| wavelength(nm) | 4L     |         | 5L     |         | 6L     |         |
|----------------|--------|---------|--------|---------|--------|---------|
|                | n      | k       | n      | k       | n      | k       |
| 345            | 2.5614 | 1.8298  | 3.0358 | 1.3321  | 3.0844 | 1.3501  |
| 350            | 3.194  | 1.3347  | 3.0551 | 1.3281  | 3.1263 | 1.3278  |
| 355            | 3.125  | 1.4035  | 3.1296 | 1.3226  | 3.1888 | 1.3263  |
| 360            | 3.2429 | 1.4139  | 3.2271 | 1.321   | 3.2635 | 1.3337  |
| 365            | 3.2509 | 1.5094  | 3.2787 | 1.3537  | 3.3504 | 1.3692  |
| 370            | 3.4527 | 1.4604  | 3.3782 | 1.4042  | 3.4356 | 1.4218  |
| 375            | 3.5296 | 1.5183  | 3.4467 | 1.4665  | 3.5215 | 1.4918  |
| 380            | 3.5911 | 1.6489  | 3.5307 | 1.572   | 3.598  | 1.5798  |
| 385            | 3.6367 | 1.7441  | 3.5988 | 1.6661  | 3.6692 | 1.6879  |
| 390            | 3.694  | 1.8858  | 3.6456 | 1.7875  | 3.7171 | 1.8181  |
| 395            | 3.7279 | 2.0512  | 3.6812 | 1.9205  | 3.7502 | 1.9475  |
| 400            | 3.7228 | 2.1625  | 3.7    | 2.0316  | 3.7609 | 2.0817  |
| 405            | 3.7459 | 2.205   | 3.7055 | 2.1543  | 3.7696 | 2.1851  |
| 410            | 3.7663 | 2.3166  | 3.7282 | 2.2037  | 3.7707 | 2.2849  |
| 415            | 3.689  | 2.5041  | 3.716  | 2.311   | 3.7685 | 2.3836  |
| 420            | 3.8204 | 2.4765  | 3.7435 | 2.373   | 3.8037 | 2.4242  |
| 425            | 3.825  | 2.5621  | 3.8057 | 2.3871  | 3.8434 | 2.4684  |
| 430            | 3.9221 | 2.6016  | 3.8774 | 2.4095  | 3.9145 | 2.5102  |
| 435            | 4.0918 | 2.5361  | 3.9761 | 2.4199  | 4.025  | 2.5045  |
| 440            | 4.2156 | 2.5281  | 4.0915 | 2.4114  | 4.1697 | 2.4642  |
| 445            | 4.3628 | 2.4465  | 4.2231 | 2.3754  | 4.3019 | 2.4399  |
| 450            | 4.4941 | 2.3408  | 4.363  | 2.3038  | 4.4553 | 2.3357  |
| 455            | 4.6071 | 2.1983  | 4.4893 | 2.1779  | 4.5806 | 2.2191  |
| 460            | 4.6802 | 2.0611  | 4.584  | 2.0393  | 4.678  | 2.0717  |
| 465            | 4.7282 | 1.8988  | 4.6426 | 1.8974  | 4.7455 | 1.9145  |
| 470            | 4.749  | 1.7469  | 4.6799 | 1.7471  | 4.7787 | 1.762   |
| 475            | 4.7481 | 1.6091  | 4.696  | 1.5934  | 4.789  | 1.619   |
| 480            | 4.7362 | 1.4717  | 4.6796 | 1.4624  | 4.7778 | 1.4747  |
| 485            | 4.7031 | 1.3579  | 4.6507 | 1.3532  | 4.7532 | 1.3492  |
| 490            | 4.6591 | 1.2501  | 4.6138 | 1.2294  | 4.7125 | 1.2375  |
| 495            | 4.6139 | 1.1679  | 4.57   | 1.156   | 4.6664 | 1.145   |
| 500            | 4.5608 | 1.0933  | 4.5203 | 1.0741  | 4.614  | 1.068   |
| 505            | 4.5105 | 1.0365  | 4.4705 | 1.0094  | 4.562  | 1.0016  |
| 510            | 4.4681 | 0.98793 | 4.4263 | 0.95779 | 4.5105 | 0.94978 |
| 515            | 4.4167 | 0.94254 | 4.3782 | 0.91445 | 4.4636 | 0.90615 |

|     |        |         |        |         |        |         |
|-----|--------|---------|--------|---------|--------|---------|
| 520 | 4.3717 | 0.91075 | 4.337  | 0.87585 | 4.416  | 0.86924 |
| 525 | 4.3385 | 0.87681 | 4.2945 | 0.85184 | 4.3725 | 0.83965 |
| 530 | 4.2953 | 0.85398 | 4.2561 | 0.82294 | 4.3307 | 0.81397 |
| 535 | 4.2566 | 0.83392 | 4.2181 | 0.80078 | 4.2934 | 0.79583 |
| 540 | 4.2195 | 0.82141 | 4.1836 | 0.78992 | 4.2575 | 0.77728 |
| 545 | 4.196  | 0.803   | 4.1526 | 0.7659  | 4.2234 | 0.76694 |
| 550 | 4.1629 | 0.79384 | 4.1246 | 0.76979 | 4.1946 | 0.75332 |
| 555 | 4.1337 | 0.79206 | 4.0911 | 0.75762 | 4.165  | 0.74949 |
| 560 | 4.1085 | 0.78915 | 4.0697 | 0.75156 | 4.1388 | 0.74522 |
| 565 | 4.0855 | 0.78346 | 4.0452 | 0.75376 | 4.1148 | 0.74631 |
| 570 | 4.0621 | 0.78814 | 4.0281 | 0.75084 | 4.0906 | 0.74932 |
| 575 | 4.0469 | 0.79079 | 4.0067 | 0.76026 | 4.0728 | 0.75755 |
| 580 | 4.0238 | 0.80428 | 3.9861 | 0.76684 | 4.0539 | 0.7701  |
| 585 | 4.0138 | 0.81894 | 3.9703 | 0.77828 | 4.0419 | 0.78739 |
| 590 | 4.0034 | 0.84196 | 3.9569 | 0.79617 | 4.0334 | 0.81297 |
| 595 | 4.0026 | 0.87146 | 3.9538 | 0.8258  | 4.0393 | 0.8412  |
| 600 | 4.0203 | 0.91388 | 3.9554 | 0.8607  | 4.0595 | 0.87293 |
| 605 | 4.0568 | 0.94228 | 3.9835 | 0.90045 | 4.0972 | 0.89817 |
| 610 | 4.1131 | 0.95913 | 4.0276 | 0.92813 | 4.1509 | 0.9087  |
| 615 | 4.1722 | 0.94849 | 4.1008 | 0.93788 | 4.2138 | 0.89697 |
| 620 | 4.2366 | 0.91014 | 4.1759 | 0.91607 | 4.2678 | 0.85902 |
| 625 | 4.272  | 0.85979 | 4.2334 | 0.85543 | 4.3055 | 0.80191 |
| 630 | 4.287  | 0.79769 | 4.2669 | 0.78154 | 4.3149 | 0.74104 |
| 635 | 4.2841 | 0.74063 | 4.2544 | 0.70846 | 4.3088 | 0.68818 |
| 640 | 4.2645 | 0.70184 | 4.2269 | 0.65469 | 4.2849 | 0.65194 |
| 645 | 4.2443 | 0.69144 | 4.1877 | 0.63311 | 4.2652 | 0.638   |
| 650 | 4.2341 | 0.69161 | 4.1576 | 0.6314  | 4.2554 | 0.64115 |
| 655 | 4.2472 | 0.69864 | 4.1489 | 0.65775 | 4.2645 | 0.65279 |
| 660 | 4.2836 | 0.70641 | 4.1709 | 0.69372 | 4.3021 | 0.65914 |
| 665 | 4.3376 | 0.68971 | 4.2397 | 0.70046 | 4.3599 | 0.64246 |
| 670 | 4.4007 | 0.63422 | 4.3282 | 0.67378 | 4.4217 | 0.58933 |
| 675 | 4.431  | 0.55125 | 4.3912 | 0.58729 | 4.4573 | 0.50454 |
| 680 | 4.4362 | 0.46543 | 4.4087 | 0.47751 | 4.4554 | 0.41062 |
| 685 | 4.4055 | 0.37922 | 4.3839 | 0.37166 | 4.4243 | 0.32837 |
| 690 | 4.3647 | 0.32056 | 4.3318 | 0.30779 | 4.378  | 0.26886 |
| 695 | 4.3169 | 0.27772 | 4.2695 | 0.25896 | 4.3291 | 0.22579 |
| 700 | 4.2732 | 0.24239 | 4.2228 | 0.22526 | 4.2818 | 0.19555 |
| 705 | 4.2329 | 0.21952 | 4.1818 | 0.20342 | 4.2399 | 0.17523 |
| 710 | 4.197  | 0.20274 | 4.1423 | 0.19703 | 4.2011 | 0.16097 |
| 715 | 4.1634 | 0.19636 | 4.1053 | 0.18286 | 4.1676 | 0.15099 |
| 720 | 4.1348 | 0.18719 | 4.0859 | 0.17904 | 4.1392 | 0.14232 |
| 725 | 4.1079 | 0.17553 | 4.0524 | 0.17421 | 4.1128 | 0.13598 |
| 730 | 4.0839 | 0.17365 | 4.0299 | 0.16416 | 4.0894 | 0.13149 |
| 735 | 4.0672 | 0.16776 | 4.0156 | 0.16941 | 4.067  | 0.12855 |

|     |        |         |        |         |        |          |
|-----|--------|---------|--------|---------|--------|----------|
| 740 | 4.0394 | 0.15977 | 3.9852 | 0.16233 | 4.0464 | 0.1255   |
| 745 | 4.015  | 0.15476 | 3.9688 | 0.16532 | 4.0261 | 0.12153  |
| 750 | 4.0067 | 0.15455 | 3.9592 | 0.1583  | 4.0097 | 0.11965  |
| 755 | 3.979  | 0.14984 | 3.9319 | 0.15873 | 3.9921 | 0.11762  |
| 760 | 3.9687 | 0.149   | 3.926  | 0.15605 | 3.9749 | 0.11452  |
| 765 | 3.9546 | 0.14577 | 3.9118 | 0.15454 | 3.9617 | 0.11422  |
| 770 | 3.9386 | 0.14733 | 3.899  | 0.14716 | 3.9498 | 0.11075  |
| 775 | 3.9217 | 0.1442  | 3.8898 | 0.15178 | 3.9342 | 0.10927  |
| 780 | 3.9136 | 0.13708 | 3.8721 | 0.14377 | 3.9212 | 0.10985  |
| 785 | 3.9127 | 0.14229 | 3.8594 | 0.14723 | 3.9133 | 0.10929  |
| 790 | 3.8948 | 0.14163 | 3.8463 | 0.14252 | 3.9023 | 0.10914  |
| 795 | 3.8853 | 0.14457 | 3.8369 | 0.14951 | 3.8884 | 0.10814  |
| 800 | 3.8607 | 0.1339  | 3.8281 | 0.14275 | 3.8839 | 0.10661  |
| 805 | 3.8493 | 0.14862 | 3.8242 | 0.14704 | 3.8699 | 0.10802  |
| 810 | 3.8543 | 0.13833 | 3.8152 | 0.14599 | 3.8588 | 0.105    |
| 815 | 3.8419 | 0.13944 | 3.8103 | 0.14411 | 3.8526 | 0.10372  |
| 820 | 3.8366 | 0.1377  | 3.7904 | 0.14833 | 3.8446 | 0.10301  |
| 825 | 3.8218 | 0.13384 | 3.7966 | 0.13969 | 3.8375 | 0.10308  |
| 830 | 3.8188 | 0.13272 | 3.7942 | 0.14769 | 3.8305 | 0.10294  |
| 835 | 3.8049 | 0.1355  | 3.7772 | 0.14329 | 3.8229 | 0.10139  |
| 840 | 3.7957 | 0.13606 | 3.777  | 0.13432 | 3.8134 | 0.10132  |
| 845 | 3.7814 | 0.14103 | 3.7651 | 0.1462  | 3.8065 | 0.10206  |
| 850 | 3.7983 | 0.13817 | 3.7593 | 0.14139 | 3.8024 | 0.10217  |
| 855 | 3.7873 | 0.12976 | 3.7534 | 0.1437  | 3.7923 | 0.097761 |
| 860 | 3.7721 | 0.12802 | 3.7489 | 0.14498 | 3.7865 | 0.098688 |
| 865 | 3.7609 | 0.13967 | 3.7459 | 0.13894 | 3.7829 | 0.10117  |
| 870 | 3.7525 | 0.13064 | 3.7407 | 0.14129 | 3.7779 | 0.10089  |
| 875 | 3.7504 | 0.13277 | 3.733  | 0.13208 | 3.7697 | 0.098302 |
| 880 | 3.749  | 0.13245 | 3.7339 | 0.13308 | 3.7645 | 0.098093 |
| 885 | 3.7494 | 0.12771 | 3.7245 | 0.13506 | 3.7597 | 0.09857  |
| 890 | 3.7507 | 0.12503 | 3.7133 | 0.12863 | 3.7546 | 0.098106 |
| 895 | 3.7348 | 0.12769 | 3.7121 | 0.13275 | 3.7498 | 0.097763 |
| 900 | 3.7305 | 0.13342 | 3.7048 | 0.13633 | 3.7443 | 0.098424 |
| 905 | 3.7231 | 0.13129 | 3.7045 | 0.13451 | 3.7398 | 0.097871 |
| 910 | 3.7173 | 0.13197 | 3.7065 | 0.13914 | 3.7359 | 0.097249 |
| 915 | 3.7126 | 0.13251 | 3.6967 | 0.13766 | 3.7313 | 0.097509 |
| 920 | 3.7056 | 0.13923 | 3.6897 | 0.13257 | 3.727  | 0.097305 |
| 925 | 3.7127 | 0.13301 | 3.6875 | 0.13715 | 3.7229 | 0.098209 |
| 930 | 3.7068 | 0.12879 | 3.6928 | 0.13281 | 3.7178 | 0.097795 |
| 935 | 3.6978 | 0.12756 | 3.6761 | 0.1361  | 3.7143 | 0.099327 |
| 940 | 3.6934 | 0.13052 | 3.6799 | 0.12969 | 3.7109 | 0.097141 |
| 945 | 3.6914 | 0.12977 | 3.6765 | 0.12749 | 3.7078 | 0.09625  |
| 950 | 3.6886 | 0.13782 | 3.6737 | 0.12456 | 3.7051 | 0.098084 |
| 955 | 3.6894 | 0.13452 | 3.6708 | 0.13453 | 3.6999 | 0.097999 |

|      |        |         |        |         |        |          |
|------|--------|---------|--------|---------|--------|----------|
| 960  | 3.6857 | 0.1339  | 3.66   | 0.12888 | 3.6974 | 0.097411 |
| 965  | 3.6795 | 0.12964 | 3.6607 | 0.13504 | 3.6908 | 0.097385 |
| 970  | 3.6736 | 0.13581 | 3.6509 | 0.13255 | 3.6874 | 0.096856 |
| 975  | 3.683  | 0.13931 | 3.6644 | 0.13727 | 3.6842 | 0.096808 |
| 980  | 3.6674 | 0.1338  | 3.6545 | 0.13241 | 3.6788 | 0.097124 |
| 985  | 3.6602 | 0.13559 | 3.6325 | 0.1357  | 3.6796 | 0.099659 |
| 990  | 3.6631 | 0.13305 | 3.6507 | 0.13053 | 3.6755 | 0.098649 |
| 995  | 3.656  | 0.13371 | 3.6474 | 0.13157 | 3.6729 | 0.099293 |
| 1000 | 3.6531 | 0.13736 | 3.6341 | 0.13545 | 3.6696 | 0.099894 |

| wavelength(nm) | 7L     |        | 8L     |        | 9L     |        |
|----------------|--------|--------|--------|--------|--------|--------|
|                | n      | k      | n      | k      | n      | k      |
| 290            | 3.4972 | 1.2998 | 3.6923 | 1.1447 | 3.7718 | 1.0328 |
| 295            | 3.5023 | 1.367  | 3.7013 | 1.178  | 3.7427 | 1.1995 |
| 300            | 3.4694 | 1.394  | 3.5908 | 1.3551 | 3.6599 | 1.2548 |
| 305            | 3.4036 | 1.4045 | 3.551  | 1.4391 | 3.6555 | 1.3201 |
| 310            | 3.336  | 1.5027 | 3.5225 | 1.3941 | 3.5823 | 1.3459 |
| 315            | 3.322  | 1.4274 | 3.4269 | 1.4865 | 3.5416 | 1.3057 |
| 320            | 3.27   | 1.479  | 3.4116 | 1.5259 | 3.4668 | 1.4714 |
| 325            | 3.2837 | 1.4556 | 3.4011 | 1.385  | 3.4815 | 1.3729 |
| 330            | 3.2944 | 1.3648 | 3.4731 | 1.3326 | 3.4809 | 1.4419 |
| 335            | 3.2633 | 1.3718 | 3.3561 | 1.4464 | 3.5402 | 1.3025 |
| 340            | 3.2637 | 1.3718 | 3.3961 | 1.4011 | 3.494  | 1.3792 |
| 345            | 3.2641 | 1.3386 | 3.4303 | 1.3006 | 3.4961 | 1.2528 |
| 350            | 3.3023 | 1.3121 | 3.4685 | 1.2757 | 3.5294 | 1.223  |
| 355            | 3.3719 | 1.299  | 3.5294 | 1.2627 | 3.5985 | 1.2029 |
| 360            | 3.4528 | 1.3035 | 3.6136 | 1.2677 | 3.6826 | 1.1982 |
| 365            | 3.5462 | 1.3336 | 3.709  | 1.2846 | 3.7724 | 1.2182 |
| 370            | 3.6376 | 1.3899 | 3.8074 | 1.3412 | 3.8714 | 1.2563 |
| 375            | 3.7289 | 1.4511 | 3.9068 | 1.3996 | 3.9637 | 1.3177 |
| 380            | 3.8197 | 1.5418 | 4.0057 | 1.4824 | 4.0666 | 1.3915 |
| 385            | 3.8902 | 1.6507 | 4.0967 | 1.5794 | 4.1601 | 1.5025 |
| 390            | 3.9566 | 1.7793 | 4.1635 | 1.7226 | 4.2379 | 1.6201 |
| 395            | 3.988  | 1.9267 | 4.2226 | 1.8519 | 4.294  | 1.7524 |
| 400            | 4.0118 | 2.062  | 4.2658 | 1.989  | 4.3405 | 1.8796 |
| 405            | 4.0171 | 2.1822 | 4.283  | 2.1322 | 4.3609 | 2.0221 |
| 410            | 4.015  | 2.2942 | 4.2965 | 2.2563 | 4.3832 | 2.1277 |
| 415            | 4.0147 | 2.3961 | 4.3059 | 2.3725 | 4.3728 | 2.275  |
| 420            | 4.01   | 2.4927 | 4.316  | 2.4728 | 4.3648 | 2.4102 |
| 425            | 4.0238 | 2.5792 | 4.3299 | 2.5766 | 4.4053 | 2.4629 |
| 430            | 4.0706 | 2.6375 | 4.357  | 2.6694 | 4.4043 | 2.5983 |
| 435            | 4.1378 | 2.6946 | 4.4244 | 2.7221 | 4.444  | 2.6994 |
| 440            | 4.2652 | 2.6905 | 4.5255 | 2.743  | 4.5095 | 2.768  |

|     |        |         |        |         |        |         |
|-----|--------|---------|--------|---------|--------|---------|
| 445 | 4.4052 | 2.663   | 4.6486 | 2.7324  | 4.5844 | 2.8411  |
| 450 | 4.5663 | 2.581   | 4.7981 | 2.6589  | 4.7501 | 2.7706  |
| 455 | 4.7063 | 2.4605  | 4.9346 | 2.5516  | 4.8882 | 2.6874  |
| 460 | 4.8215 | 2.315   | 5.0494 | 2.4198  | 5.0155 | 2.563   |
| 465 | 4.9044 | 2.1545  | 5.1369 | 2.2637  | 5.1158 | 2.4116  |
| 470 | 4.9532 | 1.9918  | 5.1916 | 2.1083  | 5.1808 | 2.2625  |
| 475 | 4.9761 | 1.8365  | 5.2233 | 1.9509  | 5.2231 | 2.0897  |
| 480 | 4.9771 | 1.6824  | 5.2282 | 1.7873  | 5.2387 | 1.9169  |
| 485 | 4.9572 | 1.5402  | 5.2146 | 1.6371  | 5.2336 | 1.7691  |
| 490 | 4.9225 | 1.4136  | 5.1826 | 1.5037  | 5.206  | 1.6275  |
| 495 | 4.878  | 1.3075  | 5.141  | 1.3902  | 5.1648 | 1.5082  |
| 500 | 4.8251 | 1.2151  | 5.0897 | 1.2925  | 5.1132 | 1.3959  |
| 505 | 4.7719 | 1.1405  | 5.0342 | 1.2078  | 5.0632 | 1.3087  |
| 510 | 4.7172 | 1.0777  | 4.978  | 1.1377  | 5.002  | 1.2349  |
| 515 | 4.6645 | 1.0258  | 4.9221 | 1.0764  | 4.9488 | 1.1719  |
| 520 | 4.6139 | 0.98249 | 4.8702 | 1.0307  | 4.8958 | 1.1221  |
| 525 | 4.5651 | 0.94689 | 4.8203 | 0.98996 | 4.8426 | 1.0836  |
| 530 | 4.522  | 0.91761 | 4.771  | 0.95779 | 4.7954 | 1.0463  |
| 535 | 4.4782 | 0.89218 | 4.7243 | 0.93056 | 4.7499 | 1.0169  |
| 540 | 4.4403 | 0.87335 | 4.6828 | 0.9099  | 4.707  | 0.98963 |
| 545 | 4.4041 | 0.85673 | 4.645  | 0.89235 | 4.6695 | 0.9703  |
| 550 | 4.3703 | 0.84602 | 4.6095 | 0.87971 | 4.6325 | 0.95709 |
| 555 | 4.3375 | 0.83775 | 4.576  | 0.87198 | 4.6    | 0.94654 |
| 560 | 4.3095 | 0.8319  | 4.5456 | 0.8651  | 4.5676 | 0.93708 |
| 565 | 4.283  | 0.83031 | 4.5171 | 0.8632  | 4.541  | 0.93583 |
| 570 | 4.2577 | 0.83351 | 4.4911 | 0.86544 | 4.5113 | 0.93621 |
| 575 | 4.2347 | 0.84044 | 4.4695 | 0.87351 | 4.4871 | 0.9397  |
| 580 | 4.2144 | 0.85344 | 4.4499 | 0.88519 | 4.4684 | 0.95332 |
| 585 | 4.197  | 0.87124 | 4.4335 | 0.90199 | 4.4462 | 0.96934 |
| 590 | 4.1902 | 0.89627 | 4.424  | 0.92556 | 4.4355 | 0.99475 |
| 595 | 4.1932 | 0.92731 | 4.4263 | 0.95421 | 4.4391 | 1.0275  |
| 600 | 4.2113 | 0.96158 | 4.4429 | 0.98682 | 4.4556 | 1.0629  |
| 605 | 4.2497 | 0.99109 | 4.4772 | 1.0156  | 4.4912 | 1.0969  |
| 610 | 4.3046 | 1.0072  | 4.5292 | 1.0338  | 4.5487 | 1.1162  |
| 615 | 4.3719 | 0.99878 | 4.5922 | 1.0317  | 4.6197 | 1.1127  |
| 620 | 4.4325 | 0.96306 | 4.6579 | 1.002   | 4.688  | 1.0805  |
| 625 | 4.4818 | 0.90513 | 4.7114 | 0.9479  | 4.7432 | 1.0185  |
| 630 | 4.502  | 0.8389  | 4.74   | 0.88053 | 4.7696 | 0.9466  |
| 635 | 4.4977 | 0.77679 | 4.7446 | 0.81452 | 4.7704 | 0.87832 |
| 640 | 4.4752 | 0.73226 | 4.7273 | 0.76155 | 4.7502 | 0.82588 |
| 645 | 4.4491 | 0.70943 | 4.7029 | 0.72954 | 4.7219 | 0.79517 |
| 650 | 4.432  | 0.70719 | 4.6851 | 0.7185  | 4.702  | 0.79334 |
| 655 | 4.435  | 0.72109 | 4.6814 | 0.72287 | 4.699  | 0.80448 |
| 660 | 4.467  | 0.73742 | 4.704  | 0.73177 | 4.729  | 0.82186 |

|     |        |          |        |          |        |         |
|-----|--------|----------|--------|----------|--------|---------|
| 665 | 4.5298 | 0.73315  | 4.7528 | 0.72707  | 4.7919 | 0.82357 |
| 670 | 4.6078 | 0.68726  | 4.8171 | 0.68928  | 4.8726 | 0.78365 |
| 675 | 4.666  | 0.59454  | 4.8704 | 0.61454  | 4.9433 | 0.69605 |
| 680 | 4.6761 | 0.48363  | 4.8903 | 0.51437  | 4.963  | 0.5781  |
| 685 | 4.647  | 0.38463  | 4.8732 | 0.41919  | 4.943  | 0.46674 |
| 690 | 4.598  | 0.3088   | 4.8323 | 0.33856  | 4.8923 | 0.38264 |
| 695 | 4.5437 | 0.25494  | 4.7814 | 0.2786   | 4.8365 | 0.31781 |
| 700 | 4.4906 | 0.21878  | 4.7296 | 0.23671  | 4.7787 | 0.27401 |
| 705 | 4.442  | 0.19383  | 4.6795 | 0.20579  | 4.7266 | 0.24176 |
| 710 | 4.3986 | 0.1754   | 4.6358 | 0.18508  | 4.6804 | 0.21788 |
| 715 | 4.3601 | 0.16272  | 4.5942 | 0.1686   | 4.6386 | 0.20133 |
| 720 | 4.3252 | 0.15274  | 4.5574 | 0.15747  | 4.5989 | 0.19057 |
| 725 | 4.2952 | 0.14619  | 4.5273 | 0.14864  | 4.5628 | 0.18154 |
| 730 | 4.2678 | 0.1395   | 4.4969 | 0.14141  | 4.5366 | 0.1743  |
| 735 | 4.2421 | 0.13593  | 4.4708 | 0.13618  | 4.5081 | 0.16678 |
| 740 | 4.217  | 0.13169  | 4.4458 | 0.13096  | 4.481  | 0.16298 |
| 745 | 4.1952 | 0.12704  | 4.4218 | 0.12653  | 4.4563 | 0.15832 |
| 750 | 4.1743 | 0.12604  | 4.4002 | 0.12364  | 4.4345 | 0.15283 |
| 755 | 4.1555 | 0.12129  | 4.3803 | 0.12012  | 4.4136 | 0.15051 |
| 760 | 4.1389 | 0.1201   | 4.3617 | 0.1169   | 4.3922 | 0.14691 |
| 765 | 4.1227 | 0.11758  | 4.3437 | 0.11588  | 4.3773 | 0.14221 |
| 770 | 4.1064 | 0.11639  | 4.3282 | 0.11193  | 4.3573 | 0.14208 |
| 775 | 4.0927 | 0.11393  | 4.3129 | 0.11032  | 4.3438 | 0.13904 |
| 780 | 4.0796 | 0.1128   | 4.2978 | 0.11047  | 4.3291 | 0.1358  |
| 785 | 4.0668 | 0.11275  | 4.2846 | 0.1064   | 4.3149 | 0.13477 |
| 790 | 4.0534 | 0.11062  | 4.2707 | 0.10698  | 4.3012 | 0.13296 |
| 795 | 4.0397 | 0.11007  | 4.2593 | 0.10523  | 4.286  | 0.12998 |
| 800 | 4.0301 | 0.10719  | 4.2458 | 0.10259  | 4.2751 | 0.12882 |
| 805 | 4.0179 | 0.10728  | 4.2331 | 0.10131  | 4.2621 | 0.12699 |
| 810 | 4.0077 | 0.10608  | 4.2227 | 0.099294 | 4.2491 | 0.12501 |
| 815 | 3.9976 | 0.10568  | 4.2115 | 0.097373 | 4.2399 | 0.12492 |
| 820 | 3.9891 | 0.10431  | 4.2017 | 0.096565 | 4.2289 | 0.12063 |
| 825 | 3.9809 | 0.10323  | 4.1931 | 0.095439 | 4.22   | 0.12048 |
| 830 | 3.9721 | 0.10319  | 4.1842 | 0.095125 | 4.2102 | 0.11856 |
| 835 | 3.9637 | 0.10154  | 4.1749 | 0.093883 | 4.1994 | 0.11879 |
| 840 | 3.955  | 0.10175  | 4.1656 | 0.093628 | 4.1892 | 0.11732 |
| 845 | 3.9489 | 0.10215  | 4.1581 | 0.092538 | 4.1822 | 0.11646 |
| 850 | 3.9379 | 0.09965  | 4.15   | 0.091605 | 4.1743 | 0.11646 |
| 855 | 3.9318 | 0.10056  | 4.1397 | 0.091592 | 4.164  | 0.11486 |
| 860 | 3.9243 | 0.09773  | 4.1329 | 0.091321 | 4.1572 | 0.1142  |
| 865 | 3.9194 | 0.097773 | 4.1253 | 0.088939 | 4.1489 | 0.11333 |
| 870 | 3.9123 | 0.096894 | 4.118  | 0.089321 | 4.1426 | 0.11253 |
| 875 | 3.906  | 0.096658 | 4.1108 | 0.086885 | 4.1345 | 0.11163 |
| 880 | 3.8986 | 0.095618 | 4.1026 | 0.086427 | 4.1266 | 0.10953 |

|      |        |          |        |          |        |         |
|------|--------|----------|--------|----------|--------|---------|
| 885  | 3.892  | 0.09492  | 4.097  | 0.086398 | 4.1205 | 0.10868 |
| 890  | 3.8872 | 0.095464 | 4.0899 | 0.086771 | 4.1144 | 0.10922 |
| 895  | 3.8807 | 0.093879 | 4.0835 | 0.08629  | 4.1077 | 0.1072  |
| 900  | 3.8756 | 0.093993 | 4.0769 | 0.085472 | 4.1013 | 0.10737 |
| 905  | 3.8676 | 0.092612 | 4.0717 | 0.085391 | 4.0954 | 0.10671 |
| 910  | 3.8641 | 0.094722 | 4.0659 | 0.085023 | 4.0873 | 0.10872 |
| 915  | 3.8589 | 0.092782 | 4.0599 | 0.085014 | 4.0827 | 0.10507 |
| 920  | 3.8547 | 0.093257 | 4.056  | 0.084889 | 4.0774 | 0.10645 |
| 925  | 3.85   | 0.09313  | 4.0507 | 0.084378 | 4.0728 | 0.10621 |
| 930  | 3.8441 | 0.092887 | 4.0461 | 0.085745 | 4.0668 | 0.10531 |
| 935  | 3.8401 | 0.091613 | 4.0421 | 0.084569 | 4.0631 | 0.10413 |
| 940  | 3.8355 | 0.092333 | 4.0365 | 0.083004 | 4.0568 | 0.10517 |
| 945  | 3.8314 | 0.092179 | 4.0302 | 0.084009 | 4.0512 | 0.10484 |
| 950  | 3.826  | 0.090759 | 4.0249 | 0.082722 | 4.0484 | 0.10433 |
| 955  | 3.8218 | 0.09071  | 4.0196 | 0.082297 | 4.0429 | 0.10295 |
| 960  | 3.8184 | 0.09035  | 4.0163 | 0.083586 | 4.0382 | 0.10119 |
| 965  | 3.8119 | 0.090305 | 4.0132 | 0.082068 | 4.034  | 0.10269 |
| 970  | 3.8114 | 0.089903 | 4.0075 | 0.08227  | 4.0285 | 0.10053 |
| 975  | 3.8056 | 0.091299 | 4.003  | 0.082816 | 4.0233 | 0.1022  |
| 980  | 3.8006 | 0.091263 | 3.9987 | 0.082014 | 4.0206 | 0.10192 |
| 985  | 3.798  | 0.090927 | 3.9955 | 0.083107 | 4.0154 | 0.10174 |
| 990  | 3.7938 | 0.091766 | 3.9911 | 0.08252  | 4.0111 | 0.10077 |
| 995  | 3.7913 | 0.091764 | 3.9878 | 0.082941 | 4.0073 | 0.1008  |
| 1000 | 3.7867 | 0.093497 | 3.9844 | 0.082239 | 4.0022 | 0.10074 |

### 10L

| wavelength(nm) | n      | k       |
|----------------|--------|---------|
| 275            | 3.8889 | 0.46559 |
| 280            | 3.9301 | 0.83355 |
| 285            | 3.8389 | 0.86449 |
| 290            | 3.8264 | 1.0317  |
| 295            | 3.7683 | 1.0961  |
| 300            | 3.7541 | 1.2344  |
| 305            | 3.7127 | 1.2669  |
| 310            | 3.6691 | 1.252   |
| 315            | 3.6259 | 1.275   |
| 320            | 3.5782 | 1.345   |
| 325            | 3.5906 | 1.2531  |
| 330            | 3.5811 | 1.2913  |
| 335            | 3.5242 | 1.3573  |
| 340            | 3.5243 | 1.3895  |

|     |        |         |
|-----|--------|---------|
| 345 | 3.5694 | 1.2122  |
| 350 | 3.6053 | 1.1739  |
| 355 | 3.6695 | 1.1487  |
| 360 | 3.7566 | 1.148   |
| 365 | 3.8485 | 1.157   |
| 370 | 3.9498 | 1.2021  |
| 375 | 4.0538 | 1.2517  |
| 380 | 4.1583 | 1.3426  |
| 385 | 4.2525 | 1.4359  |
| 390 | 4.3427 | 1.5527  |
| 395 | 4.4126 | 1.6849  |
| 400 | 4.4668 | 1.8126  |
| 405 | 4.4984 | 1.9556  |
| 410 | 4.5164 | 2.0879  |
| 415 | 4.5229 | 2.2223  |
| 420 | 4.5349 | 2.3319  |
| 425 | 4.5421 | 2.4486  |
| 430 | 4.5628 | 2.5578  |
| 435 | 4.6021 | 2.6651  |
| 440 | 4.6889 | 2.7158  |
| 445 | 4.7219 | 2.8865  |
| 450 | 4.8609 | 2.8627  |
| 455 | 5.0147 | 2.798   |
| 460 | 5.1515 | 2.6832  |
| 465 | 5.2829 | 2.4814  |
| 470 | 5.3587 | 2.2918  |
| 475 | 5.4033 | 2.1126  |
| 480 | 5.4136 | 1.9448  |
| 485 | 5.4078 | 1.7579  |
| 490 | 5.3769 | 1.6211  |
| 495 | 5.33   | 1.4952  |
| 500 | 5.2755 | 1.377   |
| 505 | 5.2115 | 1.2789  |
| 510 | 5.1501 | 1.2042  |
| 515 | 5.0907 | 1.1464  |
| 520 | 5.032  | 1.0924  |
| 525 | 4.976  | 1.0438  |
| 530 | 4.9239 | 1.0179  |
| 535 | 4.8733 | 0.98939 |
| 540 | 4.8288 | 0.95548 |
| 545 | 4.7877 | 0.94788 |
| 550 | 4.7497 | 0.93046 |
| 555 | 4.7173 | 0.91882 |
| 560 | 4.6814 | 0.91307 |



|     |        |          |
|-----|--------|----------|
| 565 | 4.6495 | 0.90966  |
| 570 | 4.6224 | 0.90747  |
| 575 | 4.593  | 0.91041  |
| 580 | 4.5699 | 0.92088  |
| 585 | 4.549  | 0.94077  |
| 590 | 4.5356 | 0.97007  |
| 595 | 4.536  | 1.0036   |
| 600 | 4.5524 | 1.0479   |
| 605 | 4.59   | 1.0794   |
| 610 | 4.6502 | 1.1032   |
| 615 | 4.7286 | 1.1016   |
| 620 | 4.8042 | 1.0707   |
| 625 | 4.8661 | 1.0051   |
| 630 | 4.8941 | 0.9276   |
| 635 | 4.8926 | 0.84516  |
| 640 | 4.8683 | 0.78793  |
| 645 | 4.8297 | 0.75324  |
| 650 | 4.8004 | 0.75122  |
| 655 | 4.7931 | 0.77326  |
| 660 | 4.8199 | 0.80189  |
| 665 | 4.8913 | 0.81809  |
| 670 | 4.9919 | 0.78371  |
| 675 | 5.0777 | 0.68249  |
| 680 | 5.1046 | 0.55076  |
| 685 | 5.0776 | 0.42479  |
| 690 | 5.0175 | 0.32756  |
| 695 | 4.9536 | 0.26415  |
| 700 | 4.891  | 0.21591  |
| 705 | 4.837  | 0.18612  |
| 710 | 4.7828 | 0.16645  |
| 715 | 4.7347 | 0.14724  |
| 720 | 4.6958 | 0.13861  |
| 725 | 4.6612 | 0.12378  |
| 730 | 4.6303 | 0.12181  |
| 735 | 4.5992 | 0.11637  |
| 740 | 4.5678 | 0.11279  |
| 745 | 4.5464 | 0.1092   |
| 750 | 4.5231 | 0.10622  |
| 755 | 4.4982 | 0.10033  |
| 760 | 4.4776 | 0.10159  |
| 765 | 4.46   | 0.095861 |
| 770 | 4.4429 | 0.096327 |
| 775 | 4.4271 | 0.092949 |
| 780 | 4.4096 | 0.092671 |

|      |        |          |
|------|--------|----------|
| 785  | 4.3944 | 0.0904   |
| 790  | 4.3814 | 0.089364 |
| 795  | 4.3657 | 0.089596 |
| 800  | 4.3543 | 0.085195 |
| 805  | 4.3403 | 0.086865 |
| 810  | 4.3274 | 0.08522  |
| 815  | 4.3174 | 0.081597 |
| 820  | 4.3074 | 0.080824 |
| 825  | 4.2978 | 0.081814 |
| 830  | 4.2874 | 0.080366 |
| 835  | 4.2757 | 0.077703 |
| 840  | 4.2655 | 0.078495 |
| 845  | 4.2572 | 0.081157 |
| 850  | 4.2466 | 0.077832 |
| 855  | 4.2395 | 0.079486 |
| 860  | 4.2321 | 0.078655 |
| 865  | 4.2248 | 0.075373 |
| 870  | 4.2151 | 0.07729  |
| 875  | 4.2097 | 0.074161 |
| 880  | 4.2004 | 0.071378 |
| 885  | 4.1926 | 0.072436 |
| 890  | 4.1867 | 0.073229 |
| 895  | 4.1784 | 0.071606 |
| 900  | 4.1725 | 0.074564 |
| 905  | 4.1657 | 0.07173  |
| 910  | 4.158  | 0.070905 |
| 915  | 4.1541 | 0.07066  |
| 920  | 4.1469 | 0.071455 |
| 925  | 4.1423 | 0.070668 |
| 930  | 4.1391 | 0.070459 |
| 935  | 4.1314 | 0.071227 |
| 940  | 4.1272 | 0.070284 |
| 945  | 4.1227 | 0.070336 |
| 950  | 4.117  | 0.068629 |
| 955  | 4.1106 | 0.068798 |
| 960  | 4.1089 | 0.070415 |
| 965  | 4.1046 | 0.069971 |
| 970  | 4.0976 | 0.070051 |
| 975  | 4.0931 | 0.068335 |
| 980  | 4.0894 | 0.067586 |
| 985  | 4.0849 | 0.068757 |
| 990  | 4.0802 | 0.067641 |
| 995  | 4.0755 | 0.067518 |
| 1000 | 4.0732 | 0.068066 |

## References

- S1 Yu, Y. F. *et al.* Controlled Scalable Synthesis of Uniform, High-Quality Monolayer and Few-layer MoS<sub>2</sub> Films. *Sci Rep-Uk* **3**, 1866 (2013).
- S2 Kresse, G. & Furthmuller, J. Efficient iterative schemes for ab initio total-energy calculations using a plane-wave basis set. *Physical Review B* **54**, 11169-11186, (1996).
- S3 Becke, A. D. Density-Functional Exchange-Energy Approximation with Correct Asymptotic-Behavior. *Phys Rev A* **38**, 3098-3100, (1988).
- S4 Shi, H. L., Pan, H., Zhang, Y. W. & Yakobson, B. I. Quasiparticle band structures and optical properties of strained monolayer MoS<sub>2</sub> and WS<sub>2</sub>. *Physical Review B* **87**, 155304 (2013).
